# Supplementary material
Source: PubMed Central journal article supplement (PMC2868578)
Supplement: emboj201039s1.pdf [file emboj201039s1.pdf]

## Supplemental figures

### **Figure 1.** Sub-cellular localization of MYC-tagged IBRDC2 in healthy and apoptotic cells

Typical examples of MYC-IBRDC2 localization in non-apoptotic (**A**) and apoptotic (**B**) cells are shown. HeLa cells were transfected with MYC-IBRDC2 (green on overlay images), and either were left untreated (**A**) or treated with 10 $\mu$ M ActD (**B**). Cells were immunostained with anti-MYC polyclonal antibody (Abcam) and, to reveal mitochondria, with anti-Tom20 monoclonal antibody (red on overlay images), and then analyzed by fluorescence microscopy. Bars: 20 $\mu$ m and 2.3 $\mu$ m (detail images).

### **Figure 2.** C-terminal YFP fusion of IBRDC2

Typical examples of IBRDC2-YFP localization in non-apoptotic (**A**) and apoptotic (**B**) cells are shown. HeLa cells were transfected with IBRDC2-YFP (green on overlay images), and either were left untreated (**A**) or treated with 10 $\mu$ M ActD (**B**). To reveal mitochondria and apoptosis cells were immunostained with anti-cytochrome c monoclonal antibody (red on overlay images), and then analyzed by fluorescence microscopy. Bars: 20 $\mu$ m.

### **Figure 3.** Sub-cellular localization of YFP-tagged predicted transmembrane domain of IBRDC2 (YFP-IBRDC2<sup>TM</sup>)

Typical examples of YFP-IBRDC2<sup>TM</sup> localization in non-apoptotic (**A**) and apoptotic (**B**) cells are shown. HeLa cells were transfected with YFP-IBRDC2<sup>TM</sup> (green on overlay images), and either were left untreated (**A**) or treated with 10 $\mu$ M ActD (**B**). To reveal mitochondria cells were immunostained with anti-Tom20 monoclonal antibody (red on overlay images), and then analyzed by fluorescence microscopy. Bars: 20 $\mu$ m and 2.3 $\mu$ m (detail images)

### **Figure 4.** Effect of protein synthesis and proteasome inhibition on the levels of Bax

(**A**) Control RNAi and IBRDC2 RNAi HeLa cells were incubated with 2 $\mu$ g/ml CHX, and 30 $\mu$ M zVAD-fmk (to prevent cell death) for indicated periods. Expression levels of Bax and Tom20 were analyzed by Western blot. CHX-induced changes in Bax expression (Bax level) were quantified using ImageJ software and normalized to the levels of Tom20. HeLa (**B**), or WT and Bax-/-HCT116 (**C**) cells were incubated with 2 $\mu$ g/ml CHX or 10 $\mu$ M MG132 for 15hr followed by Western blot as indicated in the figure.

### **Figure 5.** BN-PAGE analyses of Bax and IBRDC2

Mitochondrial fractions obtained from ActD- (**A**) or STS- (**B**) treated HeLa cells were analyzed by BN-PAGE (first dimension) combined with SDS-PAGE (second dimension) followed by Western blot of Bax and IBRDC2.

**Figure 6. Effect of IBRDC2 overexpression on apoptosis**

PARP cleavage (**A**), mitochondrial activation (**B**) and mitochondrial levels of Bax (**C**) in MYC-IBRDC2 or control pEYFP overexpressing HeLa cells. Cells were treated with ActD and STS, followed by Western blot of total cell lysates (**A**), or mitochondrial fractions (**B, C**) as indicated in the figure. In (**B**) mitochondrial fractions were treated with a chemical x-linker, 2mM BMH for 15 min on ice, prior to SDS PAGE and Western blot analyses. In (**A-C**) a single representative experiment is shown.

**(D) PARP cleavage in IBRDC2 overexpressing WT, Bax<sup>-/-</sup>, and Bak<sup>-/-</sup>HCT116 cells**

WT, Bax<sup>-/-</sup>, and Bak<sup>-/-</sup>HCT116 cells were transfected with either MYC-IBRDC2 (IBRDC2), or pEYFP control vector (Control), followed by the treatment with 10 $\mu$ M ActD, or 1 $\mu$ M STS for 10hr, and then Western blot analyses. The membranes were first blotted for IBRDC2 then for Bax and Tom20. Bak expression was tested using separate membranes.

The data show that in contrast to IBRDC2 downregulation, overexpression of this protein has only a slight effect on PARP cleavage. A similar minor effect of IBRDC2 overexpression on Bax translocation to the mitochondria and mitochondrial oligomerization of Bax was also detected. Furthermore, overexpression of IBRDC2 did not affected apoptosis activation in HCT116 WT, HCT116 Bax<sup>-/-</sup>, and HCT116 Bak<sup>-/-</sup> cells.

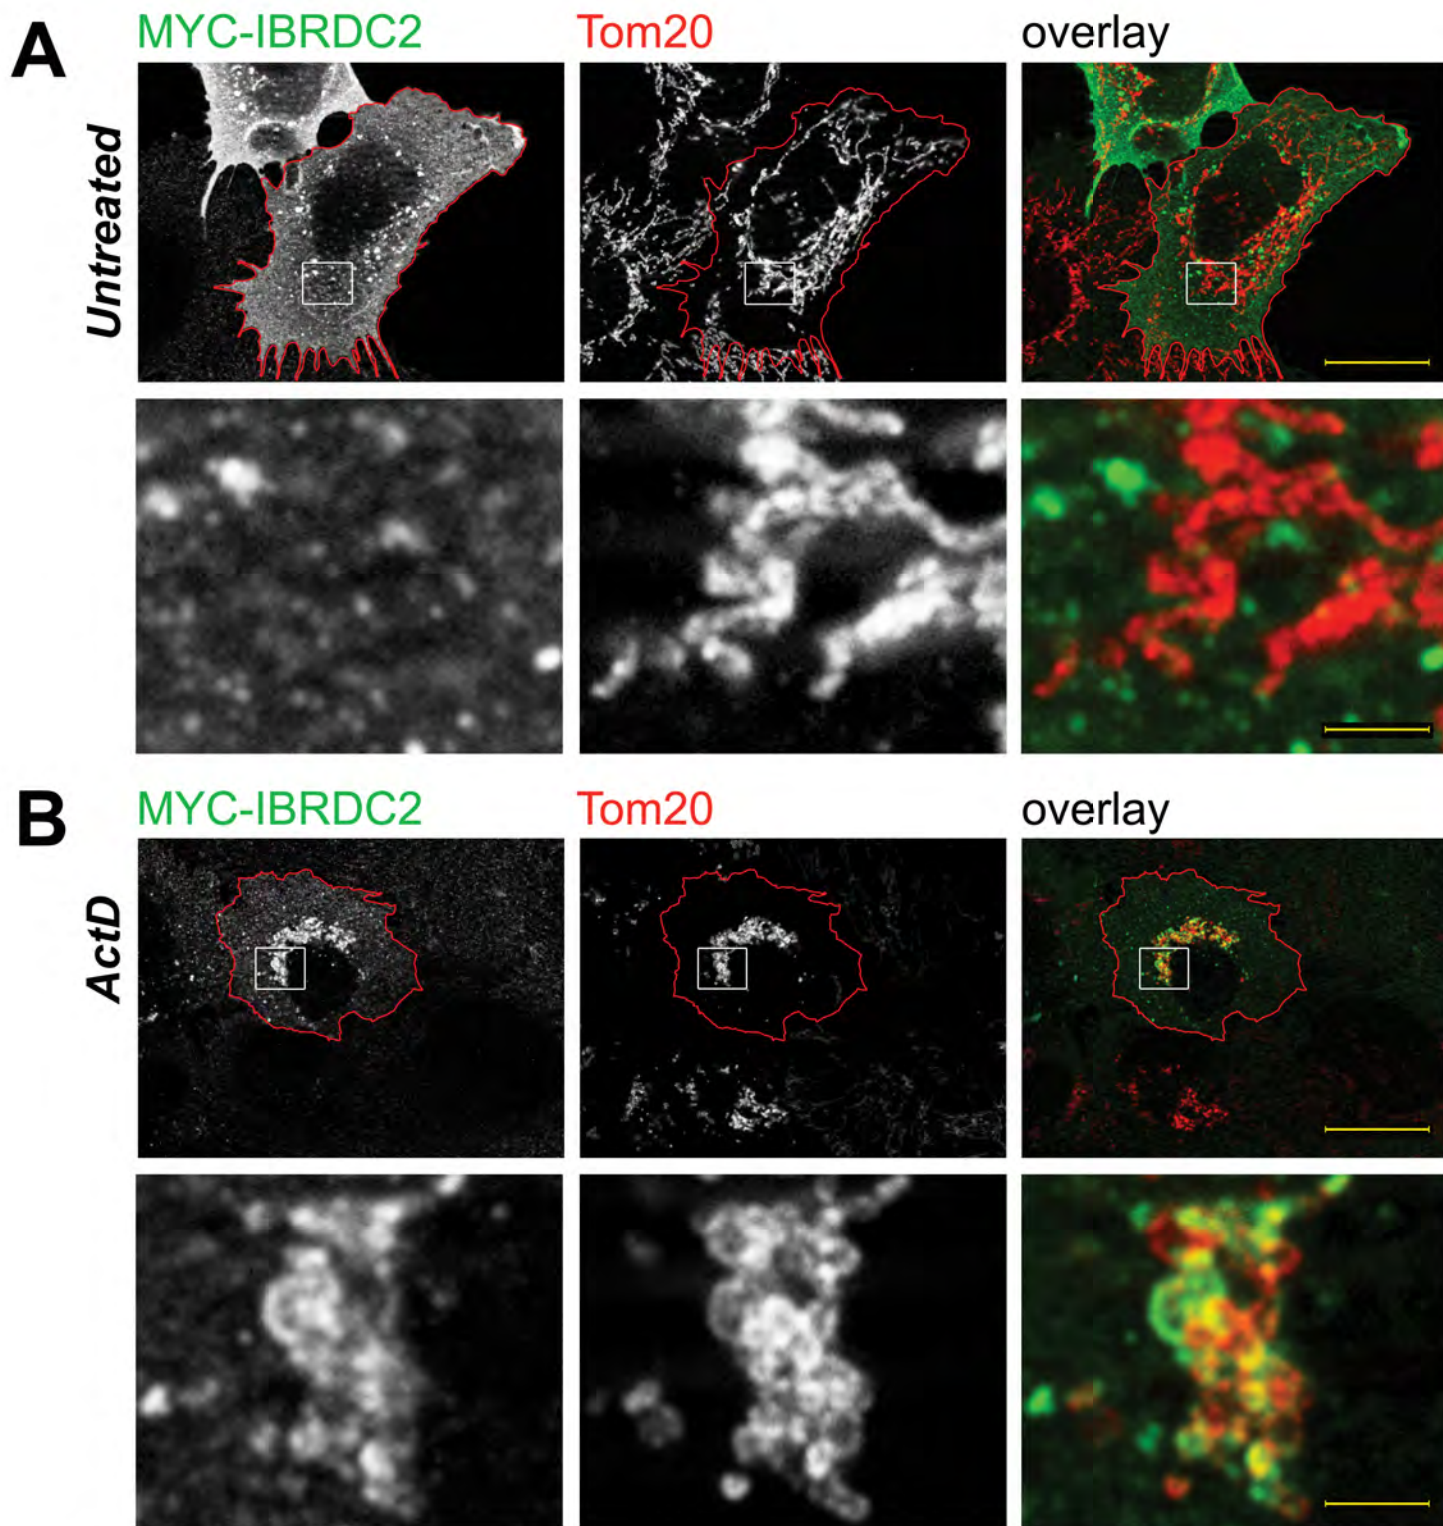

Figure\_S1

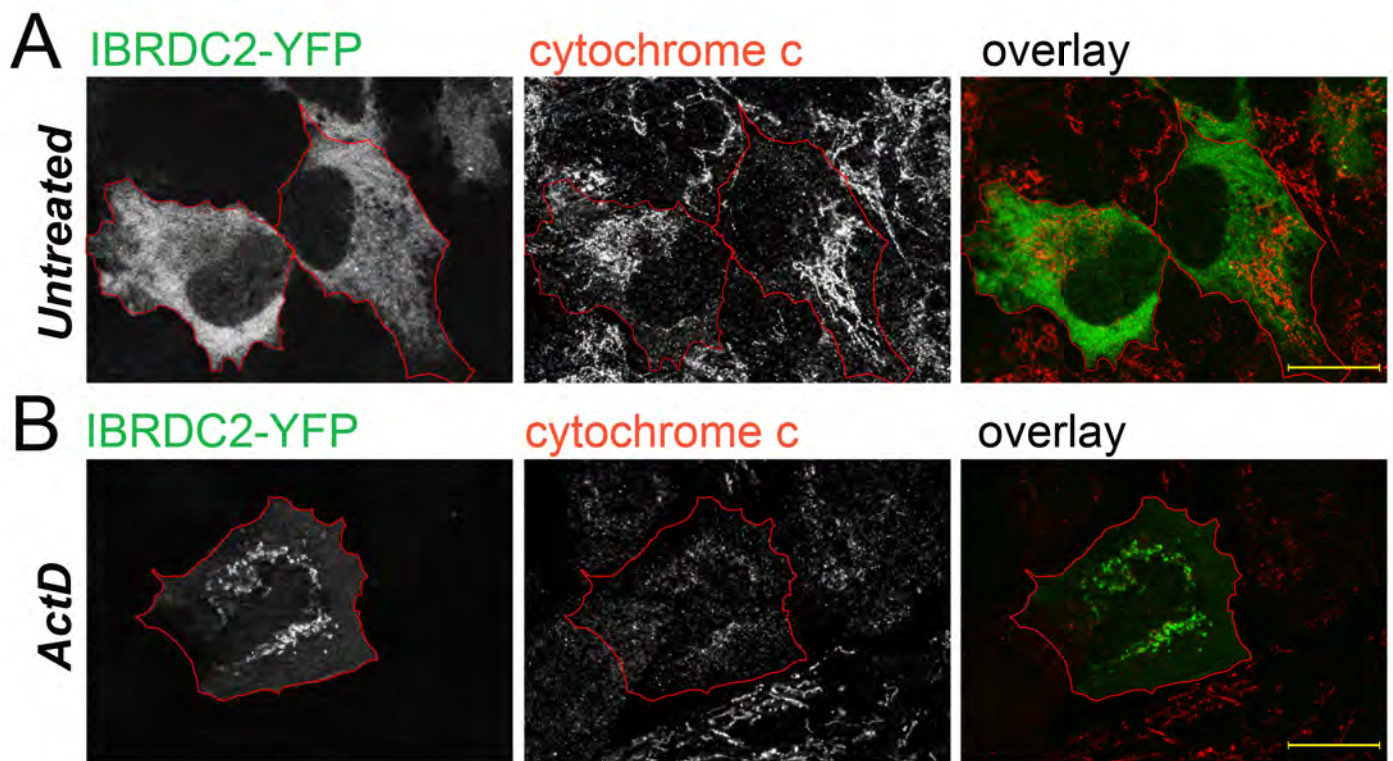

Figure\_S2

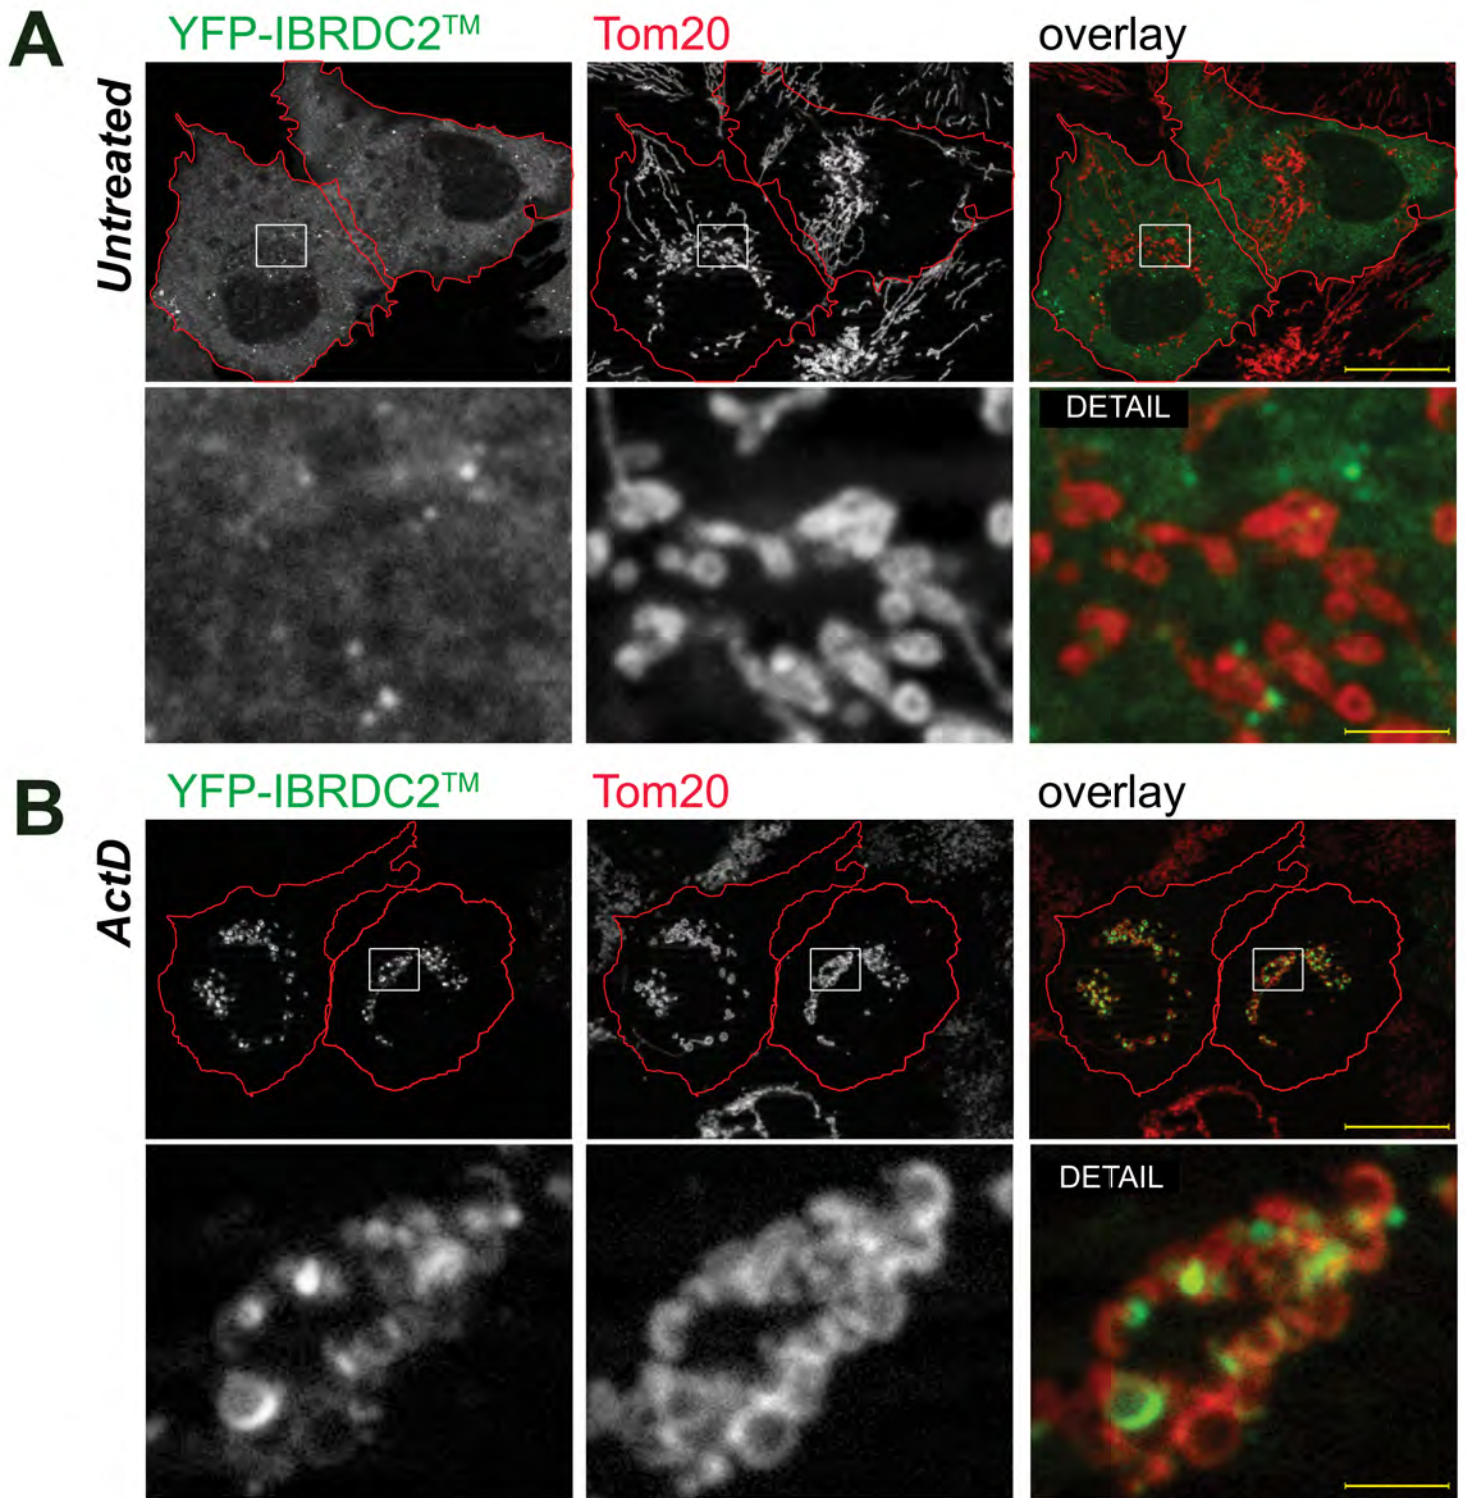

Figure\_S3

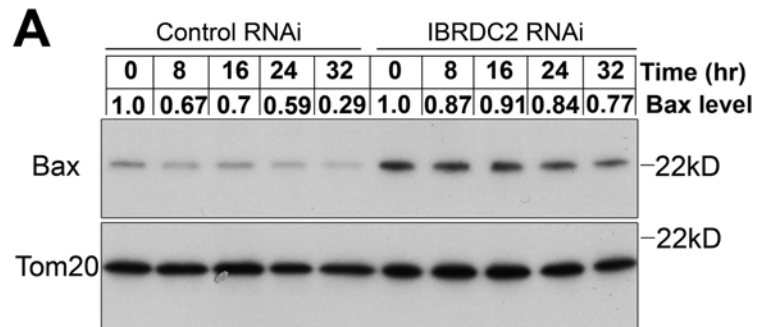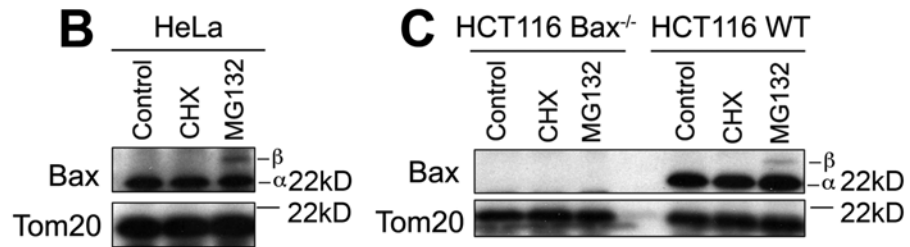

Figure\_S4

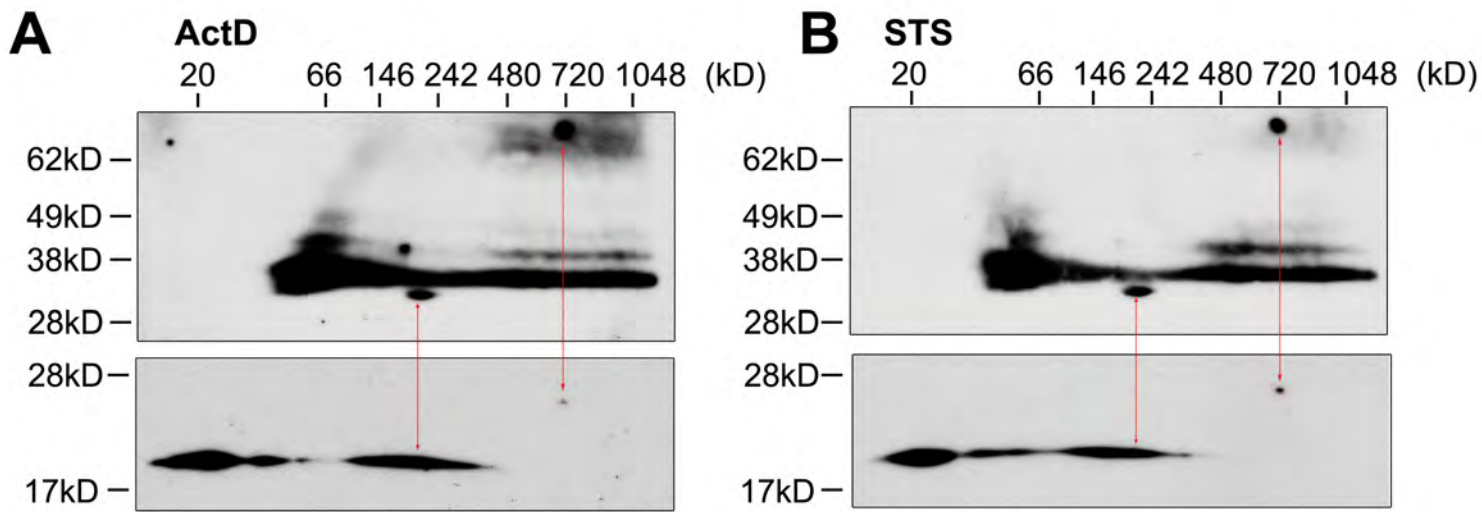

Figure\_S5

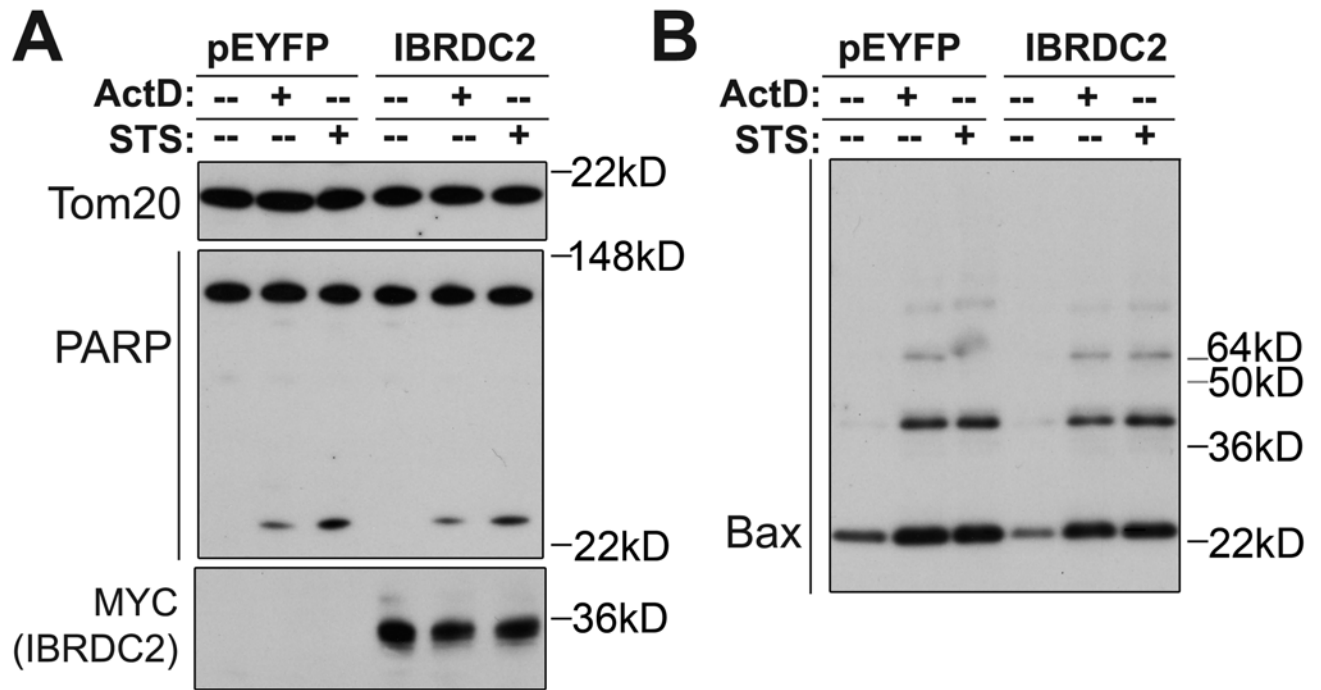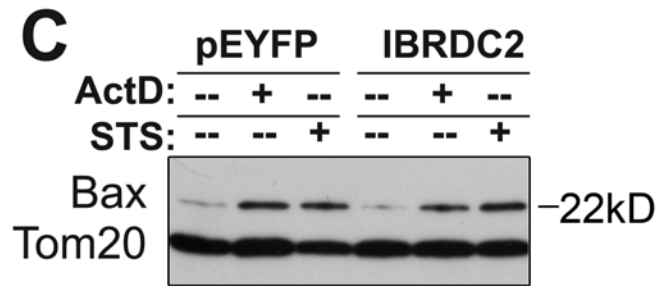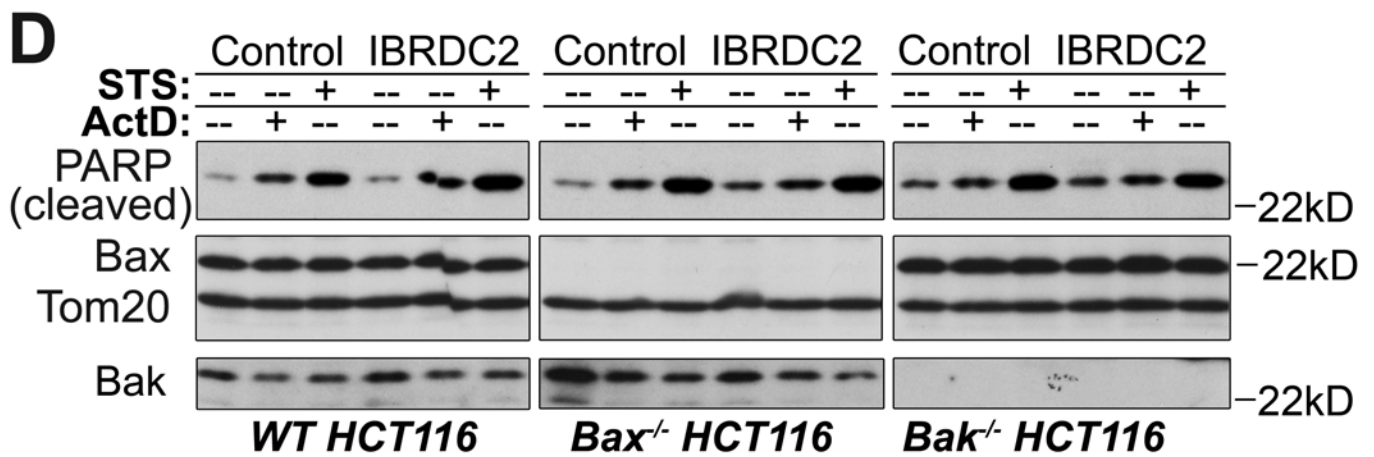

Figure\_S6
